# Supplementary material for: Extracellular signal-regulated kinases associate with and phosphorylate DHPS to promote cell proliferation
Source: PubMed Central journal article supplement (PMC7522278; doi:10.1038/s41389-020-00271-1), 2020-09-28
Supplement: 41389_2020_271_MOESM1_ESM.pdf [file 41389_2020_271_MOESM1_ESM.pdf]

SUPPLEMENTAL INFORMATION

SUPPLEMENTARY FIGURES AND FIGURE LEGENDS

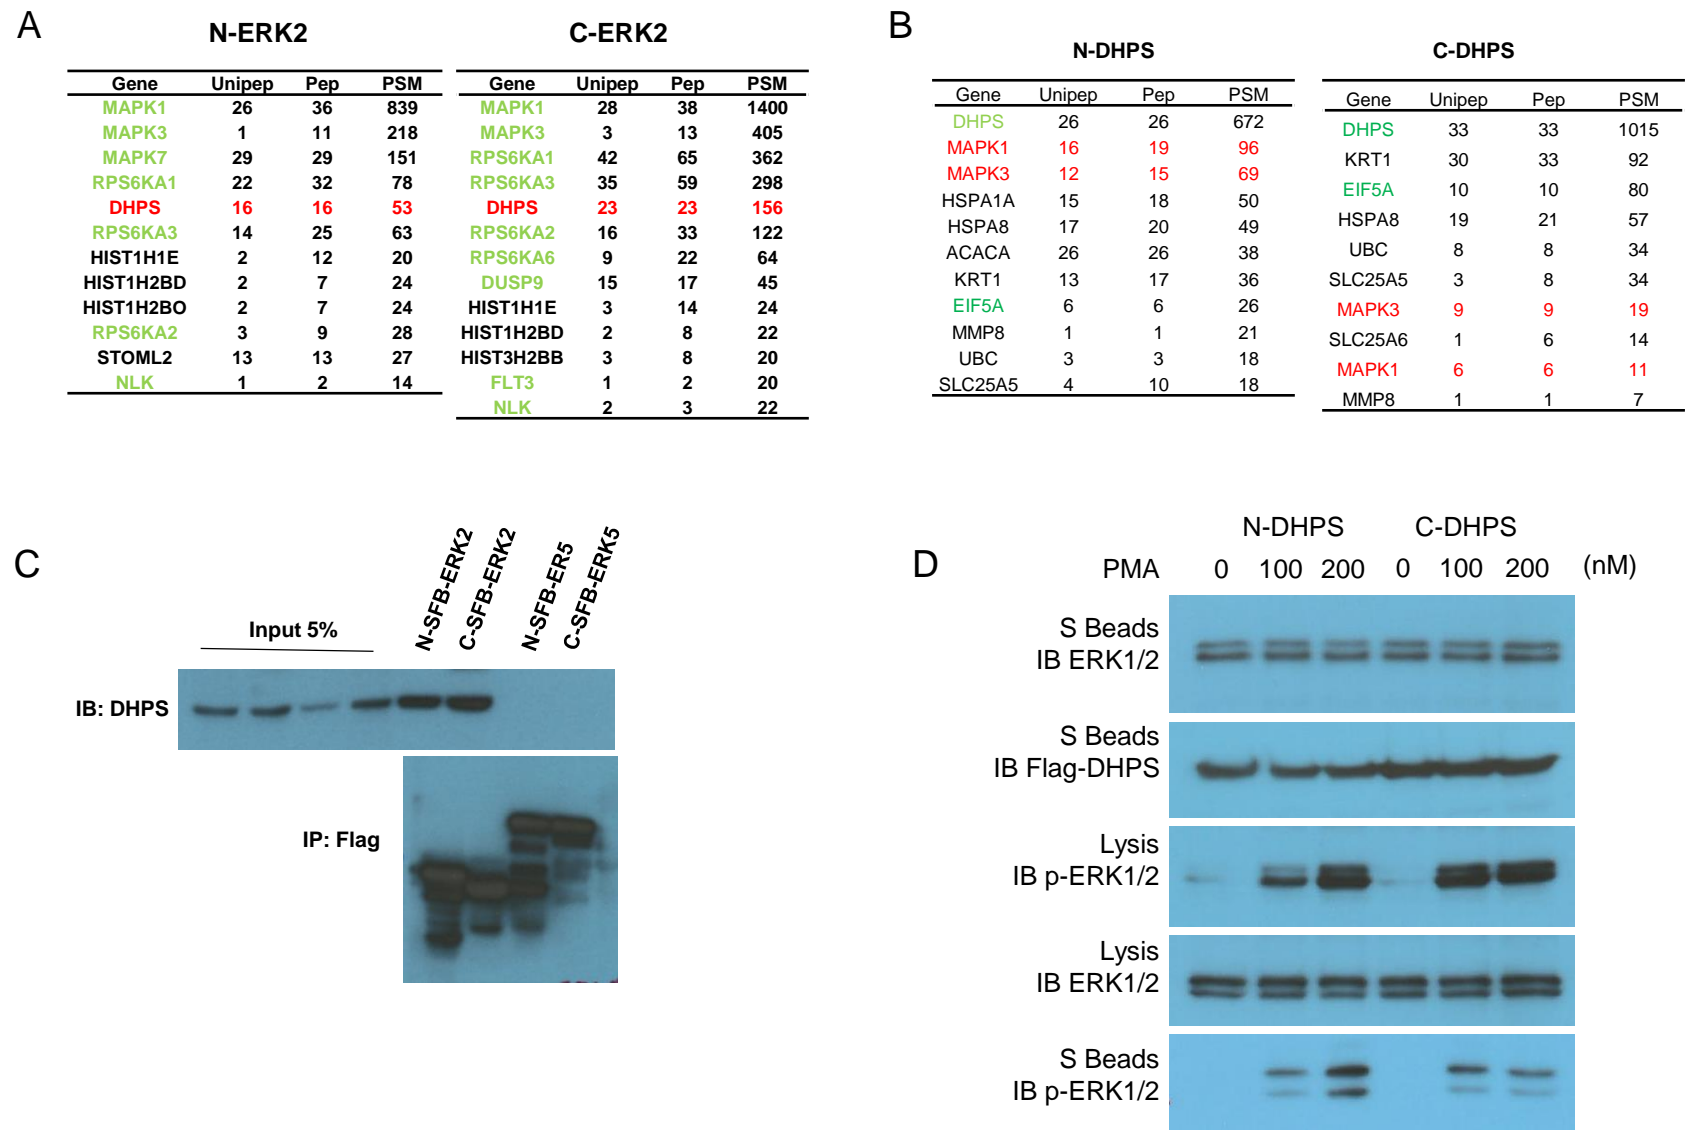

**Supplementary Figure 1** (Related to Figure 1)

- (A) The HCIP list resulting from TAP-MS analysis of N- and C-terminal SFB-tagged ERK2. The bait and reported interactors are marked with green. The candidate proteins are marked with red.
- (B) HCIP list resulting from a TAP-MS analysis of N- and C-terminal SFB-tagged DHPS. The bait and reported interactors are marked with green. The candidate proteins are marked with red.
- (C) ERK2 but not ERK5 interacts with DHPS. N- or C-terminal SFB-tagged ERK2 or ERK5 were expressed in HEK293T cells. Cell lysates were pulled down with S protein beads, and the indicated proteins were detected by Western blotting.
- (D) Association between DHPS and ERK1/2. N- or C-terminal SFB-tagged DHPS was expressed in HEK293T cells. Cell were treated with DMSO or different dosages of PMA for 30 minutes. Cell lysates were pulled down with S protein beads, and the indicated proteins were detected by Western blotting.

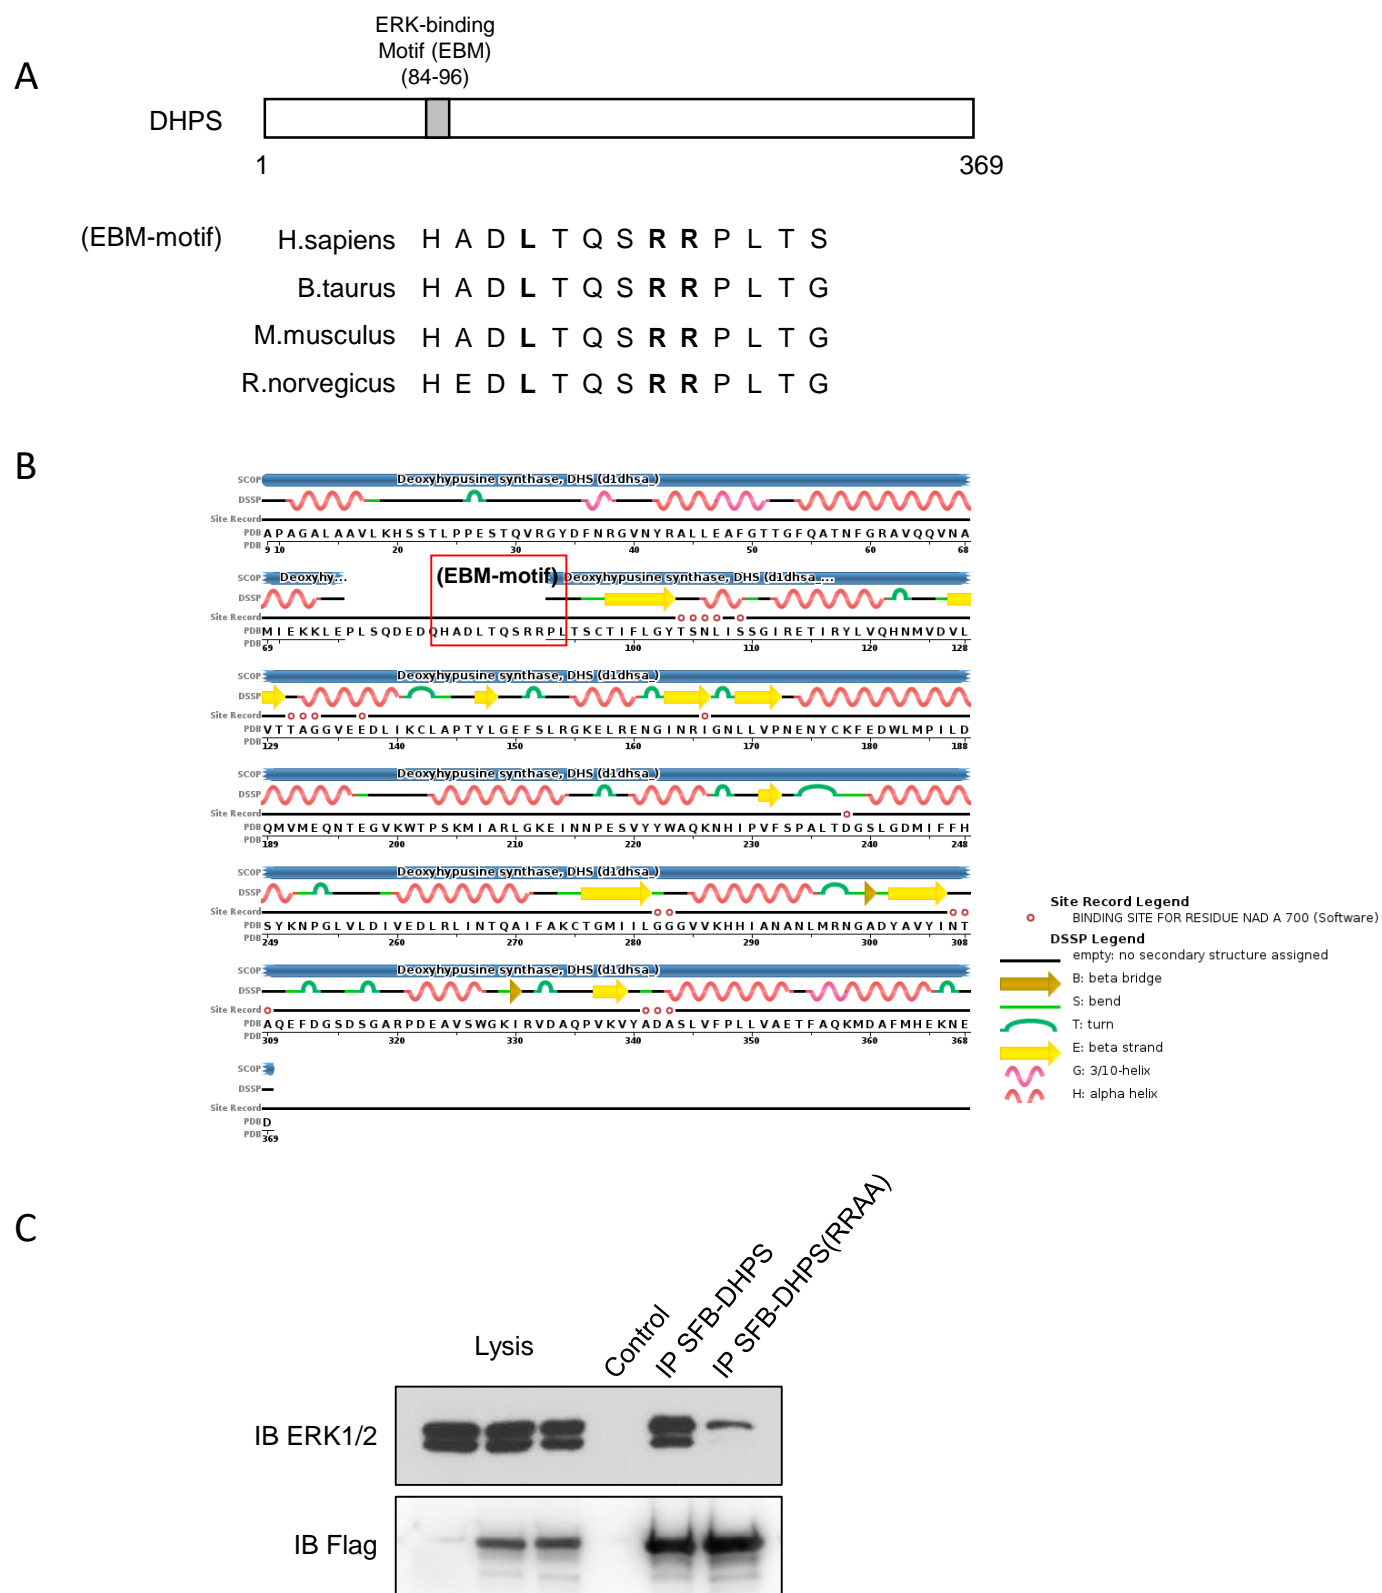

**Supplementary Figure 2.** (Related to Figure 2)

- (A) Sequence alignment of EBM between DHPS from humans and other species.
- (B) Secondary structure of DHPS protein. EBM sequence is marked by a red rectangle.
- (C) Mutations of negatively charged residues in the EBM of DHPS dramatically decrease the binding between DHPS and ERK1/2. SFB-tagged WT or the RRAA variant of DHPS was expressed in HEK293T cells. Cell lysates were pulled down with S protein beads, and the indicated protein was detected by Western blotting. Data represent a representative experiment from three independent experiments.

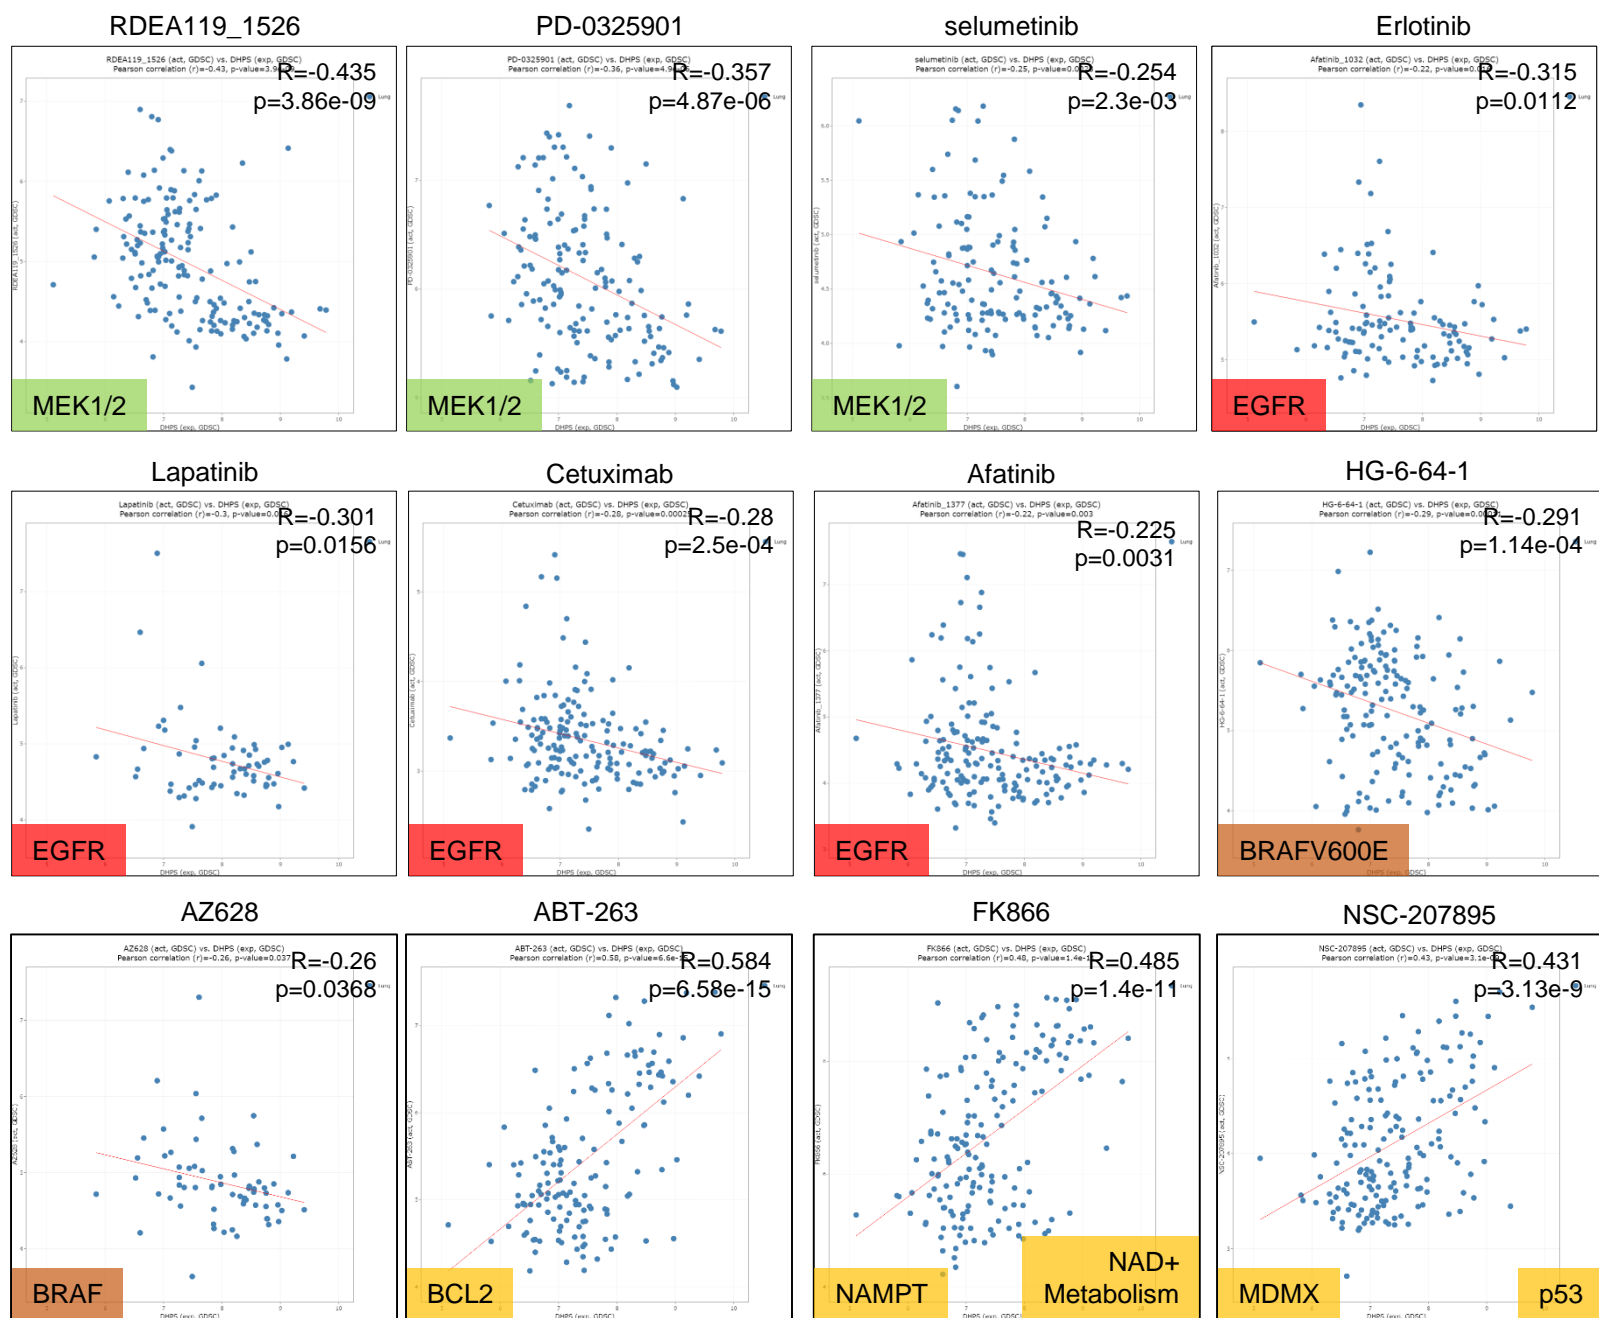

**Supplementary Figure 3.** (Related to Figure 5)

The top negative and positive correlated drugs from Figure 5 (B) were plotted. The Pearson correlation R and the p values are labeled in the panels.

**SUPPLEMENTARY TABLE CAPTIONS**

Supplementary Table 1 (Related to Figure 1). TAP-MS lists of DHPS and ERK2

Supplementary Table 2 (Related to Figure 5). Correlation between Drug activities and DHPS mRNA expression levels
