# Supplementary material for: Extracellular signal-regulated kinases associate with and phosphorylate DHPS to promote cell proliferation
Source: PubMed Central journal article supplement (PMC7522278; doi:10.1038/s41389-020-00271-1), 2020-09-28
Supplement: 41389_2020_271_MOESM4_ESM.pdf [file 41389_2020_271_MOESM4_ESM.pdf]

In accordance with Springer Nature Authorship Policy we agree to change the authors of the manuscript as indicated below.

**NAME OF JOURNAL:** Oncogenesis

**TITLE OF MANUSCRIPT:** Extracellular Signal-Regulated Kinases Associate with and Phosphorylate DHPS to Promote Cell Proliferation

**MANUSCRIPT NUMBER:** ONCSIS-20-0357R

**CORRESPONDING AUTHORS NAME:** Junjie Chen

**PREVIOUS AUTHOR NAMES:**

Chao Wang , Zhen Chen , Litong Nie , Mengfan Tang , Xu Feng , Dan Su , Huimin Zhang , Yun Xiong

**UPDATED AUTHOR NAMES:**

Chao Wang , Zhen Chen , Litong Nie , Mengfan Tang , Xu Feng , Dan Su , Huimin Zhang , Yun Xiong , Joeng-Min Park

**CHANGE TO AUTHOR LIST:**

Joeng-Min Park

| Print Name     | Signature                                                                            | Date       |
|----------------|--------------------------------------------------------------------------------------|------------|
| Junjie Chen    |  | 08/07/2020 |
| Chao Wang      |   | 08/07/2020 |
| Zhen Chen      |   | 08/07/2020 |
| Litong Nie     |   | 08/07/2020 |
| Mengfan Tang   |   | 08/07/2020 |
| Xu Feng        |   | 08/07/2020 |
| Dan Su         |   | 08/07/2020 |
| Huimin Zhang   |   | 08/07/2020 |
| Yun Xiong      |   | 08/07/2020 |
| Joeng-Min Park |   | 08/07/2020 |
